# Supplementary material for: Raman-Guided Bronchoscopy: Feasibility and Detection Depth Studies Using Ex Vivo Lung Tissues and SERS Nanoparticle Tags
Source: MDPI journal article supplement (doi:10.3390/photonics9060429), 2022-06-17
Supplement: s1 [file s1]

# Raman-Guided Bronchoscopy: Feasibility and Detection Depth Studies Using Ex Vivo Lung Tissues and SERS Nanoparticle Tags

Zongyu Wu <sup>1</sup>, Ziwen Wang <sup>2</sup>, Haoqiang Xie <sup>1</sup>, Yiming Wang <sup>1</sup>, Haoqi He <sup>1</sup>, Shuming Nie <sup>2</sup>, Jian Ye <sup>1</sup> and Li Lin <sup>1,\*</sup>

<sup>1</sup> School of Biomedical Engineering, Shanghai Jiao Tong University, Shanghai 200030, China; 2020wzy@sjtu.edu.cn (Z.W.); xiehaoqiang@sjtu.edu.cn (H.X.); wym-flpb@sjtu.edu.cn (Y.W.); hehaoqi@sjtu.edu.cn (H.H.); yejian78@sjtu.edu.cn (J.Y.)

<sup>2</sup> Department of Bioengineering, University of Illinois at Urbana-Champaign, Urbana, IL 61801, USA; ziwenw3@illinois.edu (Z.W.); nies@illinois.edu (S.N.)

\* Correspondence: linli92@sjtu.edu.cn

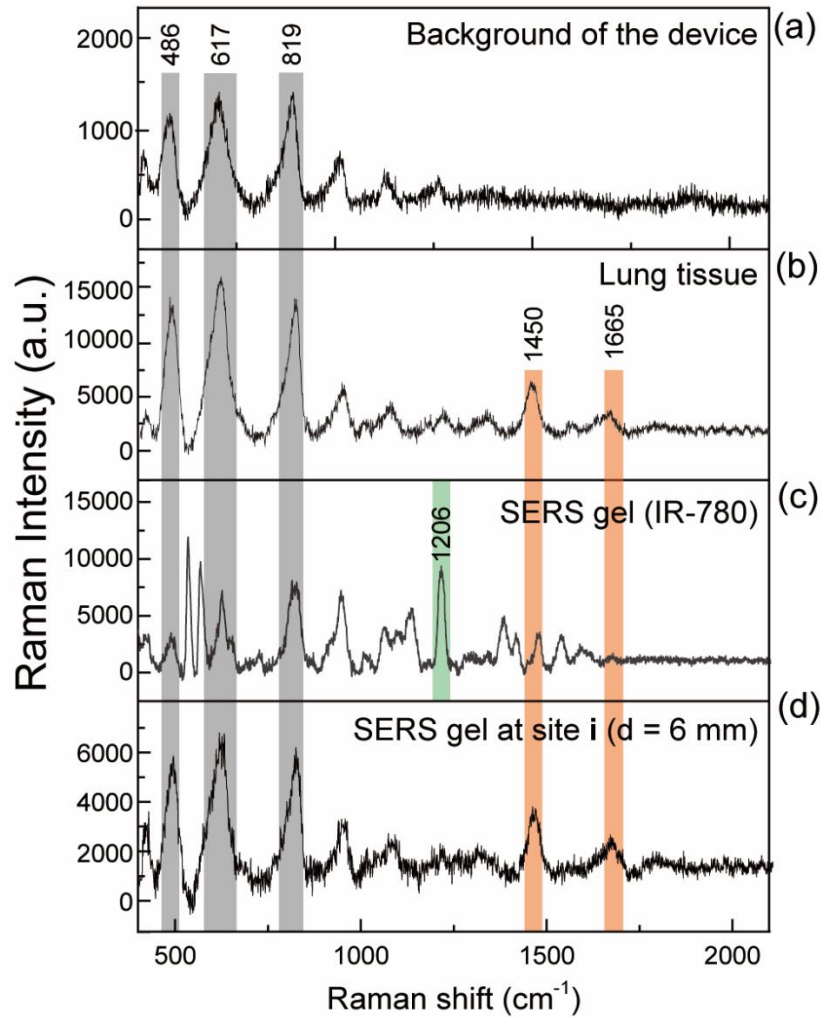

**Figure S1.** The Raman spectra of (a) device background (collected without any samples), (b) lung tissues, (c) a SERS gel containing IR-780 as the Raman reporter, and (d) the SERS gel embedded at site *i* of the lung tissue, with tissue thickness of 6 mm. All spectra were measured by the endoscopic probe, and the baselines of raw spectra were subtracted. Peaks at 486, 617, 819  $\text{cm}^{-1}$  observed in background spectrum are assumed to be caused by the optics fiber materials. Peaks at 1450 and 1665  $\text{cm}^{-1}$  are assigned to lung tissues, corresponding to the  $\text{CH}_2$  deformation peak and amine I band [1-2]. The SERS gels exhibited a strong bands at 1206  $\text{cm}^{-1}$ , corresponding to C-H in-plane deformation of IR-780 [3]; this peak is not overlapped with the fiber or tissue background. When SERS gel was embedded in lung tissues with a distance of 6 mm, the collected signal was close to that of the pure lung tissue in (b).

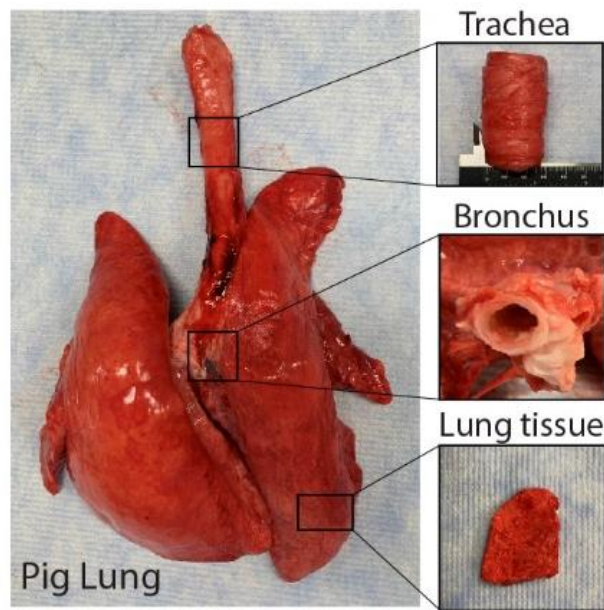

**Figure S2.** Photographs of a pig lung. The inner diameter and wall thickness of trachea is 20.7 and 3.4 mm; And that of bronchus is 12.18 and 1.7 mm, respectively.

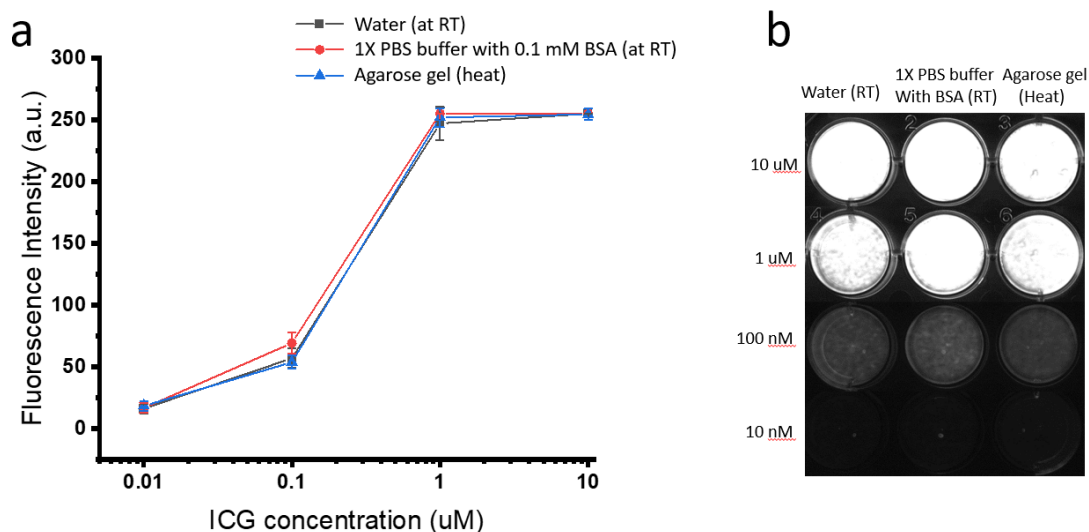

**Figure S3.** Comparison in the brightness of ICG in different media. (a) Quantative fluorescence intensities, and (b) Fluorescent images with different concentrations of ICG. The ICG power was first dissolved in DMSO solution with a high concentration, then diluted by water (black), 1x PBS buffer containing 0.1 mM bovine serum albumin (red), or heated agarose solution to form gels (blue). After forming gels, the brightness of ICG shows a very little decrease.

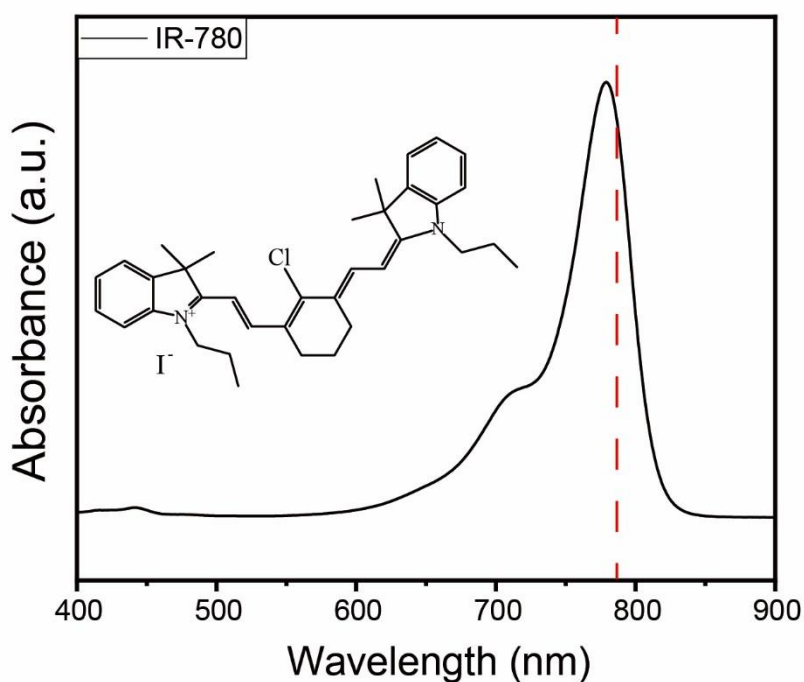

**Figure S4.** Molecular structure and absorption peak of IR-780. The molecules are dissolved in DMF. The red line indicated the laser wavelength (785 nm).

|                  | Name of branches        | Generation | Diameter (mm) |
|------------------|-------------------------|------------|---------------|
| Conducting zone  | Trachea                 | 0          | 18.0          |
|                  | Bronchi                 | 1          | 12.2          |
|                  |                         | 2          | 8.3           |
|                  |                         | 3          | 5.6           |
|                  | Bronchioles             | 4          | 4.5           |
|                  |                         | 5          | 3.5           |
| Respiratory zone | Terminal bronchioles    | 16         | 0.6           |
|                  | Respiratory bronchioles | 17         | 0.5           |
|                  |                         | 19         |               |
|                  | Alveolar ducts          | 20         |               |
|                  |                         | 22         |               |
|                  | Alveolar sacs           | 23         | 0.4           |

**Figure S5.** The scheme of lung airways, generations, and bronchus diameters. On average, a total of 21-25 generations are found between the trachea and the alveoli. Redrawn from ref [4].

**Table S1.** The fluorescence imaging depths in lung tissues with ICG gels of different concentrations as the imaging contrast.

| ICG concentration | Detection depth in lung tissue | SNR at the detection depth |
|-------------------|--------------------------------|----------------------------|
| 10 $\mu\text{M}$  | 3 mm                           | $10.83 \pm 3.16$           |
| 1 $\mu\text{M}$   | 4 mm                           | $6.15 \pm 5.79$            |
| 100 nM            | 3 mm                           | $5.30 \pm 3.40$            |
| 10 nM             | <1 mm                          | $10.76 \pm 2.11$           |

## References

- [1] Rivas-Arancibia, S., et al., Structural Changes of Amyloid Beta in Hippocampus of Rats Exposed to Ozone: A Raman Spectroscopy Study. *Front Mol Neurosci*, 2017, 10, 137.
- [2] G. Thomas, T.Q. Nguyen, I.J. Pence, et al. Evaluating feasibility of an automated 3-dimensional scanner using Raman spectroscopy for intraoperative breast margin assessment. *Sci Rep* 2017, 7, 13548.
- [3] Varghese, H.T., et al., *IR, Raman and SERS studies of methyl salicylate*. *Spectrochimica Acta Part A: Molecular and Biomolecular Spectroscopy*, 2007. **66**(4): p. 959-963.
- [4] Widmaier E P, Raff H, Strang K T. *Vander's human physiology*[M]. New York, NY: McGraw-Hill, 2006.
